# Supplementary material for: Screen Time at Age 1 Year and Communication and Problem-Solving Developmental Delay at 2 and 4 Years
Source: PubMed Central journal article supplement (PMC10442786; doi:10.1001/jamapediatrics.2023.3057), 2023-08-21
Supplement: jamapediatr-e233057-s001.pdf [file jamapediatr-e233057-s001.pdf]

## Supplementary Online Content

Takahashi I, Obara T, Ishikuro M, et al. Screen time at age 1 year and communication and problem-solving developmental delay at 2 and 4 years. *JAMA Pediatr*. Published online August 21, 2023. doi:10.1001/jamapediatrics.2023.3057

**eTable.** Results of the Complete Case Analysis (n = 6656)

This supplementary material has been provided by the authors to give readers additional information about their work.

**eTable. Results of the Complete Case Analysis (n = 6656)**

| ASQ-3                      | Screen time<br>at 1 year old | 2 years old      | 4 years old      |
|----------------------------|------------------------------|------------------|------------------|
|                            |                              | OR* (95% CI)     | OR* (95% CI)     |
| Communication              | <1                           | Ref              | Ref              |
|                            | 1-<2                         | 1.70 (1.28-2.25) | 1.11 (0.80-1.51) |
|                            | 2-<4                         | 2.13 (1.56-2.89) | 1.72 (1.24-2.38) |
|                            | ≥4                           | 5.00 (3.29-7.47) | 2.66 (1.59-4.28) |
| Gross motor                | <1                           | Ref              | Ref              |
|                            | 1-<2                         | 1.05 (0.82-1.33) | 1.02 (0.76-1.35) |
|                            | 2-<4                         | 0.90 (0.66-1.21) | 0.81 (0.56-1.15) |
|                            | ≥4                           | 1.45 (0.89-2.25) | 1.52 (0.88-2.51) |
| Fine motor                 | <1                           | Ref              | Ref              |
|                            | 1-<2                         | 1.06 (0.80-1.40) | 0.98 (0.74-1.29) |
|                            | 2-<4                         | 1.05 (0.76-1.45) | 0.99 (0.72-1.36) |
|                            | ≥4                           | 1.52 (0.89-2.47) | 1.28 (0.74-2.12) |
| Problem-solving            | <1                           | Ref              | Ref              |
|                            | 1-<2                         | 1.21 (0.90-1.62) | 0.78 (0.56-1.08) |
|                            | 2-<4                         | 1.39 (0.99-1.92) | 1.18 (0.83-1.66) |
|                            | ≥4                           | 2.47 (1.52-3.87) | 1.95 (1.13-3.21) |
| Personal and social skills | <1                           | Ref              | Ref              |
|                            | 1-<2                         | 1.03 (0.79-1.34) | 1.20 (0.91-1.58) |
|                            | 2-<4                         | 1.23 (0.91-1.64) | 1.18 (0.85-1.61) |
|                            | ≥4                           | 2.06 (1.32-3.14) | 1.52 (0.87-2.50) |

\*Adjusted for maternal age at delivery, parity, maternal educational attainment, household income, children's sex, living with grandparents or other adults at 1 year postpartum, bonding disorder at 1 year postpartum and postpartum depression at 1 year postpartum.

Missing covariates were imputed through multiple imputations by chained equation using the exposure, outcome, and covariates.
