# Supplementary material for: Screen Time at Age 1 Year and Communication and Problem-Solving Developmental Delay at 2 and 4 Years
Source: PubMed Central journal article supplement (PMC10442786; doi:10.1001/jamapediatrics.2023.3057), 2023-08-21
Supplement: jamapediatr-e233057-s002.pdf [file jamapediatr-e233057-s002.pdf]

## Data Sharing Statement

Takahashi. Screen Time at Age 1 Year and Communication and Problem-Solving Developmental Delay at 2 and 4 Years. *JAMA Pediatr.* Published August 21, 2023. doi:10.1001/jamapediatrics.2023.3057

### Data

**Data available:** Yes

**Data types:** Deidentified participant data

**How to access data:** The data that support the findings of this study are available from the TMM biobank; however, restrictions apply to the availability of these data, which were used under license for the current study and hence are not publicly available. Data are available from the authors upon reasonable request and with the permission of the TMM biobank. All inquiries about access to the data should be sent to the TMM biobank ([dist@megabank.tohoku.ac.jp](mailto:dist@megabank.tohoku.ac.jp)).

**When available:** With publication

### Supporting Documents

**Document types:** None

### Additional Information

**Who can access the data:** Researchers whose proposed use of the data has been approved

**Types of analyses:** For any purpose

**Mechanisms of data availability:** After approval of a proposal
